# Supplementary material
Source: MDPI journal article supplement (https://www.mdpi.com/2076-3417/12/22/11784)
Supplement: s1 [file s1]

## Supplementary Material

Statistical analysis performed with the IBM SPSS Statistics, version 25. Pair-wise differences were evaluated with the Tukey's and Tukey's HSD post hoc analysis (statistically significant difference if  $p < 0.05$ ).

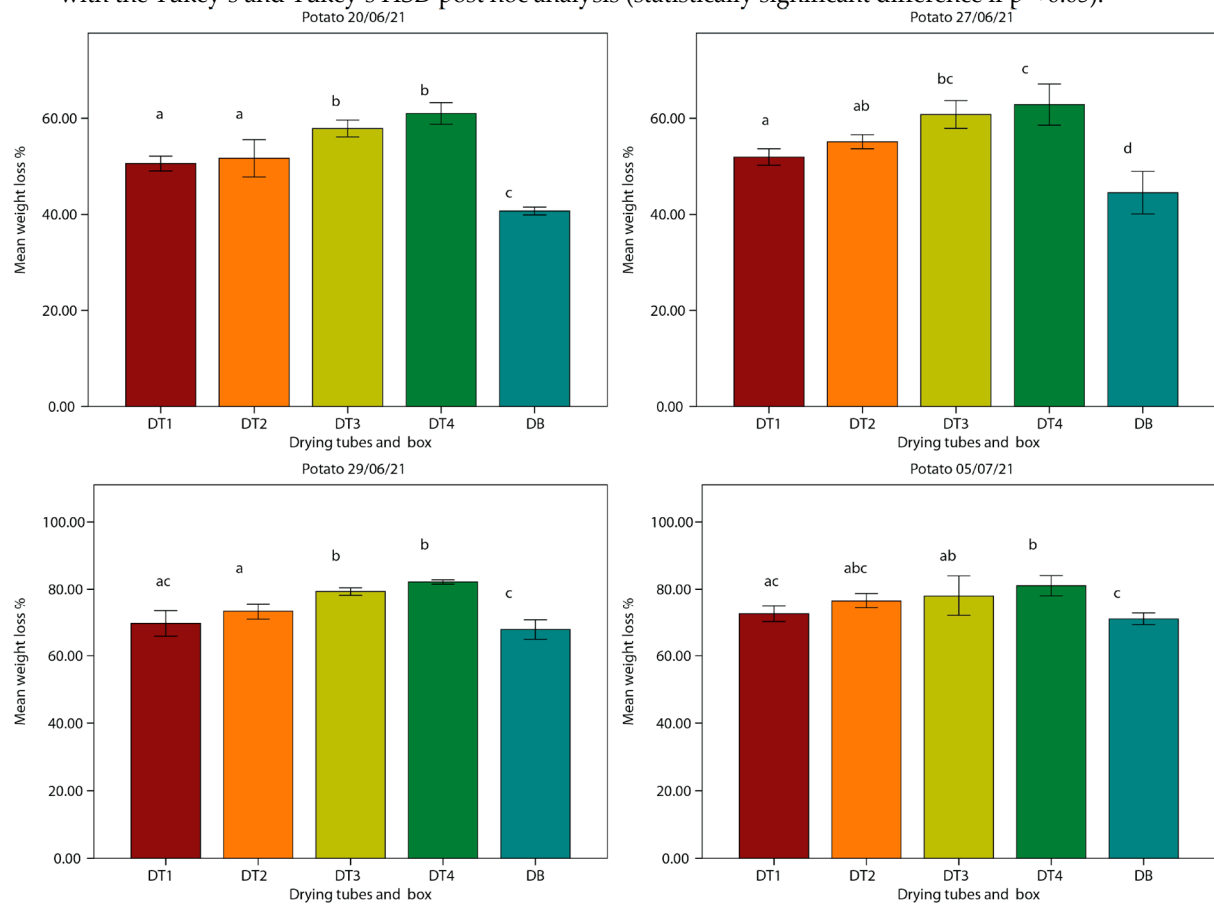

**Figure S1.** Mean weight loss of the potato samples for the first 24 hours of drying for the Drying Tubes (DT) and Drying Box (DB). I beam error bars represent the standard deviation of the means. Different letters above the coloured bars signify distinct statistical groups ( $p < 0.05$ ).

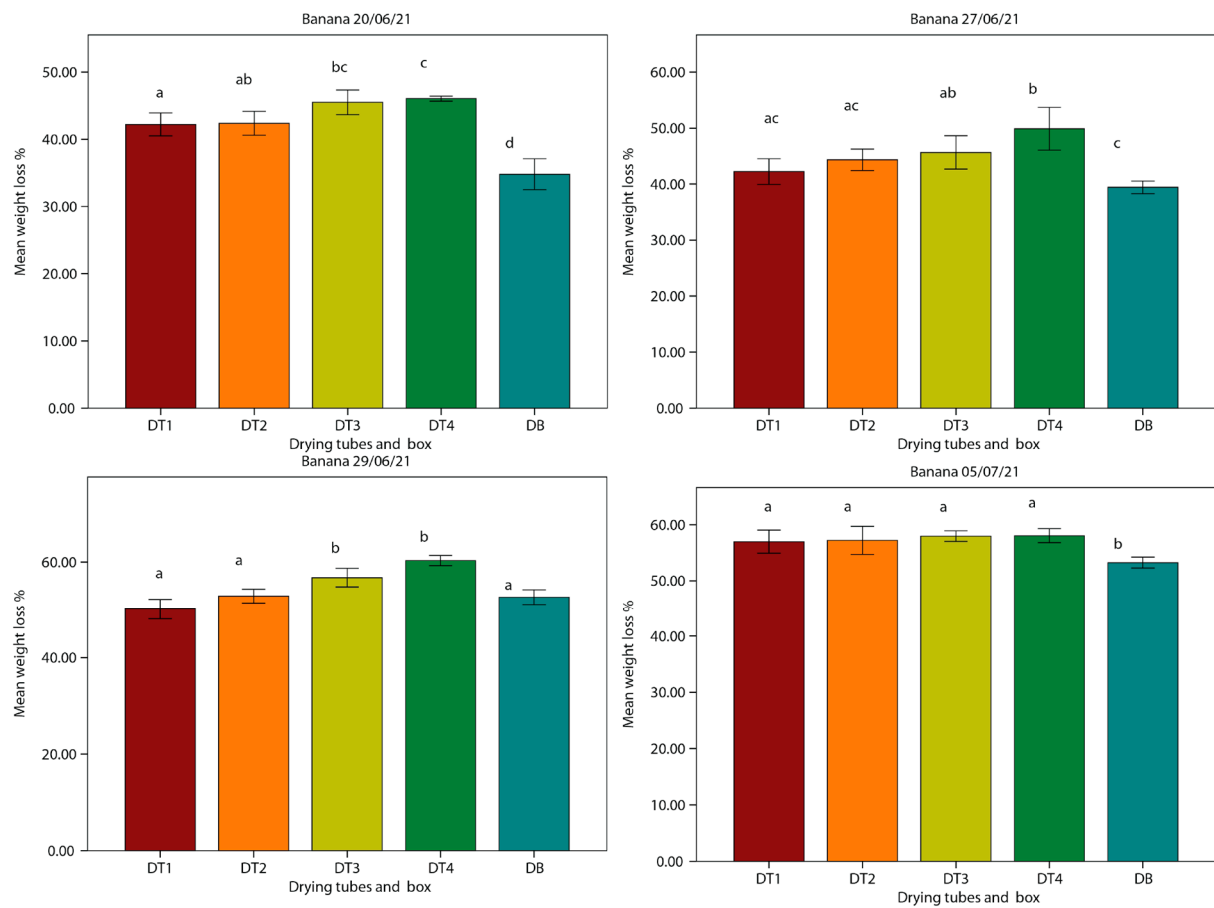

**Figure S2.** Mean weight loss of the banana samples for the first 24 hours of drying for the Drying Tubes (DT) and Drying Box (DB). I beam error bars represent the standard deviation of the means. Different letters above the coloured bars signify distinct statistical groups ( $p < 0.05$ ).
